# Supplementary material
Source: PubMed Central journal article supplement (PMC3478050)
Supplement: supp_mcs187_mcs187supp.pdf [file supp_mcs187_mcs187supp.pdf]

## SUPPLEMENTARY DATA

TABLE S1. Information on all individual plants utilized in the study. For each individual, the taxonomic designation, a population number, individual name, location in latitude and longitude is provided. Ploidy level corresponds to mitotic or meiotic counts (number of samples refers to number of slides prepared per individual) or to inferred ploidy based on 2C estimates from flow cytometry (average 2C values are reported for an individual if there were multiple flow cytometry estimates).

| Taxa                                         | Population | Plant    | Latitude | Longitude | Ploidy level       | <i>n</i>       | <i>2n</i> | 2C pg<br>(# samples) |
|----------------------------------------------|------------|----------|----------|-----------|--------------------|----------------|-----------|----------------------|
|                                              |            |          |          |           |                    | (# of samples) |           |                      |
| <i>C. parviflora</i> ssp. <i>grandiflora</i> | 34         | esp-2    | 38.17    | -120.47   | 2x                 | 6(1)           | 12(1)     | 1.889 (3)            |
| <i>C. parviflora</i> ssp. <i>grandiflora</i> | 34         | esp-3    | 38.17    | -120.47   | 2x                 | 6(1)           |           | 1.874 (1)            |
| <i>C. parviflora</i> ssp. <i>grandiflora</i> | 71         | trim 7-6 | 36.87    | -119.295  | 2x                 | 6(2)           | 12(1)     | 1.535 (3)            |
| <i>C. parviflora</i> ssp. <i>grandiflora</i> | 71         | trim7-3  | 36.87    | -119.295  | 2x                 |                | 12(1)     | 1.57 (3)             |
| <i>C. parviflora</i> ssp. <i>grandiflora</i> | 71         | trim7-5  | 36.87    | -119.295  | 2x                 |                | 12(2)     | 1.549 (3)            |
| <i>C. parviflora</i> ssp. <i>grandiflora</i> | 77         | ws-4     | 38.907   | -121.137  | 2x                 | 6(1)           | 12(1)     | 1.856 (1)            |
| <i>C. parviflora</i> ssp. <i>grandiflora</i> | 78         | wsc1     | 38.898   | -121.058  | 2x                 |                | 12(2)     | 1.867 (1)            |
| <i>C. parviflora</i> ssp. <i>grandiflora</i> | 78         | wsc2     | 38.898   | -121.058  | 2x                 |                | 12(2)     | 1.87 (1)             |
| <i>C. parviflora</i> ssp. <i>grandiflora</i> | 34         | esp1     | 38.17    | -120.47   | 2x <sub>(fc)</sub> |                |           | 1.88 (1)             |
| <i>C. parviflora</i> ssp. <i>grandiflora</i> | 50         | injm2    | 39.086   | -120.911  | 2x <sub>(fc)</sub> |                |           | 1.893 (3)            |
| <i>C. parviflora</i> ssp. <i>grandiflora</i> | 50         | injm5    | 39.086   | -120.911  | 2x <sub>(fc)</sub> |                | 12(2)     | 1.854 (1)            |
| <i>C. parviflora</i> ssp. <i>grandiflora</i> | 63         | pw1f     | 39.04    | -120.917  | 2x <sub>(fc)</sub> |                |           | 1.865 (1)            |
| <i>C. parviflora</i> ssp. <i>grandiflora</i> | 67         | shpd-1   | 38.173   | -120.451  | 2x <sub>(fc)</sub> |                |           | 1.869 (1)            |
| <i>C. parviflora</i> ssp. <i>grandiflora</i> | 67         | shpd-2   | 38.173   | -120.451  | 2x <sub>(fc)</sub> |                |           | 1.874 (1)            |
| <i>C. parviflora</i> ssp. <i>parviflora</i>  | 3          | 155c-2   | 35.72    | -118.794  | 4x                 | 12(1)          | 24(1)     | 3.259 (1)            |
| <i>C. parviflora</i> ssp. <i>parviflora</i>  | 4          | 155d-1   | 35.718   | -118.809  | 4x                 | 12(2)          | 24(1)     | 3.174 (1)            |
| <i>C. parviflora</i> ssp. <i>parviflora</i>  | 30         | Crw-19   | 38.824   | -120.953  | 4x                 |                | 24        | 3.189 (3)            |
| <i>C. parviflora</i> ssp. <i>parviflora</i>  | 30         | crw-2    | 38.824   | -120.953  | 4x                 |                | 24(1)     | 3.132 (1)            |
| <i>C. parviflora</i> ssp. <i>parviflora</i>  | 54         | mos11-1  | 39.127   | -121.054  | 4x                 |                | 24(1)     | 3.185 (3)            |
| <i>C. parviflora</i> ssp. <i>parviflora</i>  | 5          | 156f-1   | 35.743   | -118.903  | 4x <sub>(fc)</sub> |                |           | 2.934 (1)            |

|                                             |    |          |        |          |                    |       |       |           |
|---------------------------------------------|----|----------|--------|----------|--------------------|-------|-------|-----------|
| <i>C. parviflora</i> ssp. <i>parviflora</i> | 15 | botch2   | 36.388 | -121.87  | 4x <sub>(fc)</sub> |       |       | 2.975 (1) |
| <i>C. parviflora</i> ssp. <i>parviflora</i> | 7  | 247c     | 42.893 | -122.916 | 6x                 | 18(1) | 36(2) | 5.983 (2) |
| <i>C. parviflora</i> ssp. <i>parviflora</i> | 25 | crbr24   | 38.824 | -120.963 | 6x                 | 18(1) |       | 5.869 (1) |
| <i>C. parviflora</i> ssp. <i>parviflora</i> | 27 | crlin14  | 38.824 | -120.963 | 6x                 |       | 36(1) | 4.554 (3) |
| <i>C. parviflora</i> ssp. <i>parviflora</i> | 27 | crlin-20 | 38.824 | -120.963 | 6x                 | 18(1) |       | 4.38 (3)  |
| <i>C. parviflora</i> ssp. <i>parviflora</i> | 28 | crlin46  | 38.824 | -120.963 | 6x                 |       | 36(1) | 4.648 (2) |
| <i>C. parviflora</i> ssp. <i>parviflora</i> | 29 | crlin-6  | 38.824 | -120.963 | 6x                 | 18(2) | 36(1) | 4.533 (1) |
| <i>C. parviflora</i> ssp. <i>parviflora</i> | 29 | crlin9   | 38.824 | -120.963 | 6x                 | 18(1) | 36(1) | 4.757 (1) |
| <i>C. parviflora</i> ssp. <i>parviflora</i> | 35 | flp2a    | 38.704 | -121.108 | 6x                 |       | 36(3) | 4.783 (1) |
| <i>C. parviflora</i> ssp. <i>parviflora</i> | 37 | goth1    | 42.172 | -122.694 | 6x                 |       | 36(1) | 4.368 (1) |
| <i>C. parviflora</i> ssp. <i>parviflora</i> | 37 | gotl5    | 42.172 | -122.694 | 6x                 |       | 36(1) | 4.631 (3) |
| <i>C. parviflora</i> ssp. <i>parviflora</i> | 41 | gp7b-1   | 38.591 | -121.324 | 6x                 | 18(1) |       | 4.813 (1) |
| <i>C. parviflora</i> ssp. <i>parviflora</i> | 66 | sha1-7   | 40.849 | -122.342 | 6x                 |       |       | 4.94 (1)  |
| <i>C. parviflora</i> ssp. <i>parviflora</i> | 6  | 178d-3   | 35.531 | -118.629 | 6x <sub>(fc)</sub> |       |       | 4.479 (1) |
| <i>C. parviflora</i> ssp. <i>parviflora</i> | 10 | 38a-2    | 43.679 | -123.301 | 6x <sub>(fc)</sub> |       |       | 4.68 (1)  |
| <i>C. parviflora</i> ssp. <i>parviflora</i> | 14 | ahm1a    | 34.185 | -118.669 | 6x <sub>(fc)</sub> |       |       | 4.514 (3) |
| <i>C. parviflora</i> ssp. <i>parviflora</i> | 22 | col7-1   | 45.689 | -121.278 | 6x <sub>(fc)</sub> |       |       | 4.708 (1) |
| <i>C. parviflora</i> ssp. <i>parviflora</i> | 26 | crlin_19 | 38.824 | -120.963 | 6x <sub>(fc)</sub> |       |       | 4.411 (2) |
| <i>C. parviflora</i> ssp. <i>parviflora</i> | 37 | gotl-13  | 42.172 | -122.694 | 6x <sub>(fc)</sub> |       |       | 4.583 (1) |
| <i>C. parviflora</i> ssp. <i>parviflora</i> | 45 | h50b15   | 38.757 | -120.491 | 6x <sub>(fc)</sub> |       |       | 4.785 (1) |
| <i>C. parviflora</i> ssp. <i>parviflora</i> | 27 | crlin29  | 38.824 | -120.963 | 8x                 | 24(1) | 48(1) | 6.551 (1) |
| <i>C. parviflora</i> ssp. <i>parviflora</i> | 28 | crlin32  | 38.824 | -120.963 | 8x                 |       | 48(1) | 6.206 (1) |
| <i>C. parviflora</i> ssp. <i>parviflora</i> | 28 | crlin4   | 38.824 | -120.963 | Unknown            |       |       | 6.694 (1) |
| <i>C. parviflora</i> ssp. <i>parviflora</i> | 39 | gp1a-1   | 38.591 | -121.324 | Unknown            |       |       | 5.908 (2) |
| <i>C. parviflora</i> ssp. <i>parviflora</i> | 47 | h62a-10  | 42.645 | -122.81  | Unknown            |       |       | 6.263 (3) |
| <i>C. perfoliata</i> ssp. <i>mexicana</i>   | 44 | H33c4    | 34.508 | -119.292 | 2x                 | 6(1)  |       | 1.543 (3) |
| <i>C. perfoliata</i> ssp. <i>mexicana</i>   | 49 | h74a6    | 33.519 | -117.602 | 2x                 |       | 12(2) | 1.525 (3) |
| <i>C. perfoliata</i> ssp. <i>mexicana</i>   | 58 | Mul1-7   | 34.107 | -118.72  | 2x                 |       | 12(1) | 1.526 (1) |
| <i>C. perfoliata</i> ssp. <i>mexicana</i>   | 44 | H33c3    | 34.508 | -119.292 | 2x <sub>(fc)</sub> |       |       | 1.533 (1) |
| <i>C. perfoliata</i> ssp. <i>mexicana</i>   | 58 | mul1-10  | 34.107 | -118.72  | 2x <sub>(fc)</sub> |       |       | 1.536 (3) |
| <i>C. perfoliata</i> ssp. <i>mexicana</i>   | 58 | mul1-8   | 34.107 | -118.72  | 2x <sub>(fc)</sub> |       |       | 1.519 (1) |

|                                             |    |          |        |          |                    |        |        |           |
|---------------------------------------------|----|----------|--------|----------|--------------------|--------|--------|-----------|
| <i>C. perfoliata</i> ssp. <i>mexicana</i>   | 49 | h74a1    | 33.519 | -117.602 | 4x                 | 12(2)  | 24(1)  | 2.779 (2) |
| <i>C. perfoliata</i> ssp. <i>perfoliata</i> | 1  | 676-1    | 37.744 | -120.033 | Unknown            |        |        | 6.268 (1) |
| <i>C. perfoliata</i> ssp. <i>perfoliata</i> | 2  | 769-2    | 36.908 | -119.26  | Unknown            |        |        | 7.394 (1) |
| <i>C. perfoliata</i> ssp. <i>perfoliata</i> | 16 | Cab1-5   | 34.137 | -118.546 | 4x                 | 12(2)  |        | 3.006 (3) |
| <i>C. perfoliata</i> ssp. <i>perfoliata</i> | 17 | cab3-4   | 34.13  | -118.549 | 4x                 | 12(2)  | 24(1)  | 2.911 (1) |
| <i>C. perfoliata</i> ssp. <i>perfoliata</i> | 73 | trim11-2 | 36.819 | -119.387 | 4x                 |        | 24     | 3.033 (1) |
| <i>C. perfoliata</i> ssp. <i>perfoliata</i> | 74 | tuj-2-1  | 34.307 | -118.254 | 4x                 |        | 24(1)  | 2.811 (2) |
| <i>C. perfoliata</i> ssp. <i>perfoliata</i> | 73 | trim11-8 | 36.819 | -119.387 | 4x <sub>(fc)</sub> |        |        | 3.086 (1) |
| <i>C. perfoliata</i> ssp. <i>perfoliata</i> | 13 | 70b-1    | 39.858 | -121.389 | 6x                 |        | 36(2)  | 4.19 (1)  |
| <i>C. perfoliata</i> ssp. <i>perfoliata</i> | 19 | col3-3   | 45.697 | -121.668 | 6x                 | 18 (1) | 36(3)  | 4.284 (2) |
| <i>C. perfoliata</i> ssp. <i>perfoliata</i> | 24 | crbr17-  | 38.824 | -120.963 | 6x                 | 18(2)  |        | 5.881 (3) |
| <i>C. perfoliata</i> ssp. <i>perfoliata</i> | 25 | crbr-22  | 38.824 | -120.963 | 6x                 |        | 36(1)  | 4.462 (3) |
| <i>C. perfoliata</i> ssp. <i>perfoliata</i> | 26 | crbr26   | 38.824 | -120.963 | 6x                 | 18(1)  |        | 4.654 (1) |
| <i>C. perfoliata</i> ssp. <i>perfoliata</i> | 31 | davis1b  | 38.549 | -121.741 | 6x                 |        | 36 (2) | 4.364 (1) |
| <i>C. perfoliata</i> ssp. <i>perfoliata</i> | 42 | h25d     | 36.504 | -121.09  | 6x                 |        | 36(1)  | 4.736 (1) |
| <i>C. perfoliata</i> ssp. <i>perfoliata</i> | 52 | kx-1     | 38.72  | -122.263 | 6x                 | 18(1)  | 36(2)  | 4.796 (1) |
| <i>C. perfoliata</i> ssp. <i>perfoliata</i> | 56 | mtda-1   | 37.867 | -121.925 | 6x                 | 18(2)  | 36(1)  | 5.71 (2)  |
| <i>C. perfoliata</i> ssp. <i>perfoliata</i> | 57 | mtda-3   | 37.867 | -121.925 | 6x                 | 18(3)  | 36(1)  | 5.866 (1) |
| <i>C. perfoliata</i> ssp. <i>perfoliata</i> | 62 | prnsk12  | 38.044 | -122.801 | 6x                 |        | 36(1)  | 4.34 (1)  |
| <i>C. perfoliata</i> ssp. <i>perfoliata</i> | 64 | rdg13-a1 | 36.325 | -121.029 | 6x                 | 18(1)  |        | 4.713 (1) |
| <i>C. perfoliata</i> ssp. <i>perfoliata</i> | 65 | sac1     | 38.55  | -121.459 | 6x                 | 18(1)  |        | 4.338 (3) |
| <i>C. perfoliata</i> ssp. <i>perfoliata</i> | 75 | ucwa-14  | 37.086 | -121.181 | 6x                 |        | 36(1)  | 4.685 (1) |
| <i>C. perfoliata</i> ssp. <i>perfoliata</i> | 14 | ahm1b    | 34.185 | -118.669 | 6x <sub>(fc)</sub> |        |        | 4.545 (1) |
| <i>C. perfoliata</i> ssp. <i>perfoliata</i> | 24 | crbr15   | 38.824 | -120.963 | 6x <sub>(fc)</sub> |        |        | 4.703 (1) |
| <i>C. perfoliata</i> ssp. <i>perfoliata</i> | 25 | crbr2    | 38.824 | -120.963 | 6x <sub>(fc)</sub> |        |        | 4.379 (1) |
| <i>C. perfoliata</i> ssp. <i>perfoliata</i> | 26 | crbr9    | 38.824 | -120.963 | 6x <sub>(fc)</sub> |        |        | 4.476 (1) |
| <i>C. perfoliata</i> ssp. <i>perfoliata</i> | 40 | gp2a     | 38.591 | -121.324 | 6x <sub>(fc)</sub> |        |        | 4.28 (1)  |
| <i>C. perfoliata</i> ssp. <i>perfoliata</i> | 40 | gp2b     | 38.591 | -121.324 | 6x <sub>(fc)</sub> |        |        | 4.323 (1) |
| <i>C. perfoliata</i> ssp. <i>perfoliata</i> | 43 | h33b2    | 34.519 | -119.27  | 6x <sub>(fc)</sub> |        |        | 4.503 (1) |
| <i>C. perfoliata</i> ssp. <i>perfoliata</i> | 45 | h50b-3   | 38.757 | -120.491 | 6x <sub>(fc)</sub> |        |        | 4.653 (1) |
| <i>C. perfoliata</i> ssp. <i>perfoliata</i> | 11 | 62a-6    | 42.645 | -122.81  | 8x                 | 24(1)  | 48(1)  | 6.504 (2) |

|                                             |    |          |        |          |                    |       |        |           |
|---------------------------------------------|----|----------|--------|----------|--------------------|-------|--------|-----------|
| <i>C. perfoliata</i> ssp. <i>perfoliata</i> | 23 | col8-7   | 45.723 | -121.489 | 8x                 |       | 48 (1) | 6.09 (2)  |
| <i>C. perfoliata</i> ssp. <i>perfoliata</i> | 51 | krl-1    | 41.831 | -122.661 | 8x                 |       | 48(1)  | 7.283 (1) |
| <i>C. perfoliata</i> ssp. <i>perfoliata</i> | 51 | krl-8    | 41.831 | -122.661 | 8x                 | 24(1) | 48 (2) | 7.116 (2) |
| <i>C. perfoliata</i> ssp. <i>perfoliata</i> | 69 | trim1-6  | 36.746 | -119.474 | 8x                 |       | 48(1)  | 5.954 (1) |
| <i>C. perfoliata</i> ssp. <i>perfoliata</i> | 72 | trim9-2  | 36.896 | -119.295 | 8x                 |       | 48(1)  | 6 (1)     |
| <i>C. perfoliata</i> ssp. <i>perfoliata</i> | 72 | trim9-3  | 36.896 | -119.295 | 8x                 |       | 48     | 6.129 (1) |
| <i>C. perfoliata</i> ssp. <i>perfoliata</i> | 12 | 301-6    | 36.325 | -121.029 | Unknown            |       |        | 6.783 (1) |
| <i>C. perfoliata</i> ssp. <i>perfoliata</i> | 23 | col8     | 45.723 | -121.489 | Unknown            |       |        | 6.137 (1) |
| <i>C. perfoliata</i> ssp. <i>perfoliata</i> | 24 | crbr13   | 38.824 | -120.963 | Unknown            |       |        | 5.833 (3) |
| <i>C. perfoliata</i> ssp. <i>perfoliata</i> | 31 | Davis1a  | 38.549 | -121.741 | Unknown            |       |        | 7.464 (2) |
| <i>C. perfoliata</i> ssp. <i>perfoliata</i> | 32 | davis3a  | 38.549 | -121.741 | Unknown            |       |        | 6.747 (2) |
| <i>C. perfoliata</i> ssp. <i>perfoliata</i> | 32 | davis-3b | 38.549 | -121.741 | Unknown            |       |        | 7.37 (2)  |
| <i>C. perfoliata</i> ssp. <i>perfoliata</i> | 33 | davis5c  | 38.549 | -121.741 | Unknown            |       |        | 6.827 (1) |
| <i>C. perfoliata</i> ssp. <i>perfoliata</i> | 35 | flf-19   | 38.704 | -121.108 | Unknown            |       |        | 6.068 (2) |
| <i>C. perfoliata</i> ssp. <i>perfoliata</i> | 36 | Fol3-9   | 38.704 | -121.108 | Unknown            |       |        | 5.528 (3) |
| <i>C. perfoliata</i> ssp. <i>perfoliata</i> | 48 | h62a2    | 42.645 | -122.81  | Unknown            |       |        | 6.091 (1) |
| <i>C. perfoliata</i> ssp. <i>perfoliata</i> | 48 | h62a3    | 42.645 | -122.81  | Unknown            |       |        | 6.142 (1) |
| <i>C. perfoliata</i> ssp. <i>perfoliata</i> | 70 | trim6-1  | 36.868 | -119.313 | Unknown            |       |        | 5.644 (2) |
| <i>C. rubra</i> ssp. <i>depressa</i>        | 60 | prnsb1   | 37.997 | -123     | 4x                 |       | 24 (1) | 2.934 (1) |
| <i>C. rubra</i> ssp. <i>depressa</i>        | 61 | prnsc-2  | 37.999 | -123.008 | 4x                 |       | 24 (1) | 3.088 (2) |
| <i>C. rubra</i> ssp. <i>depressa</i>        | 59 | Pos1-3   | 35.795 | -118.704 | 4x <sub>(fc)</sub> |       |        | 3.144 (3) |
| <i>C. rubra</i> ssp. <i>depressa</i>        | 18 | col2-4   | 45.547 | -122.197 | 6x                 | 18(2) | 36(1)  | 4.527 (1) |
| <i>C. rubra</i> ssp. <i>depressa</i>        | 20 | Col4-8   | 45.697 | -121.668 | 8x                 | 24(1) | 48(2)  | 6.076 (1) |
| <i>C. rubra</i> ssp. <i>depressa</i>        | 21 | col6-1   | 45.69  | -121.36  | 8x                 | 24(1) | 48(1)  | 6.987 (2) |
| <i>C. rubra</i> ssp. <i>depressa</i>        | 23 | col8-1   | 45.723 | -121.489 | Unknown            |       |        | 7.287 (1) |
| <i>C. rubra</i> ssp. <i>rubra</i>           | 8  | 32a1     | 40.054 | -121.613 | 2x                 |       | 12(2)  | 1.459 (3) |
| <i>C. rubra</i> ssp. <i>rubra</i>           | 38 | gotr1    | 42.172 | -122.694 | 2x                 | 6(1)  | 12 (1) | 1.412 (1) |
| <i>C. rubra</i> ssp. <i>rubra</i>           | 38 | gotr2    | 42.172 | -122.694 | 2x                 |       | 12 (1) | 1.469 (1) |
| <i>C. rubra</i> ssp. <i>rubra</i>           | 46 | H50-e2   | 38.79  | -120.185 | 2x                 |       | 12(1)  | 1.445 (3) |
| <i>C. rubra</i> ssp. <i>rubra</i>           | 66 | sha2-6   | 40.853 | -122.426 | 2x                 | 6(1)  |        | 1.42 (3)  |
| <i>C. rubra</i> ssp. <i>rubra</i>           | 68 | slp3     | 38.717 | -120.561 | 2x                 | 6(1)  | 12 (1) | 1.507 (1) |

|                                  |    |        |        |          |             |           |
|----------------------------------|----|--------|--------|----------|-------------|-----------|
| <i>C.rubra</i> ssp. <i>rubra</i> | 8  | 32a2   | 40.054 | -121.613 | $2x_{(fc)}$ | 1.506 (2) |
| <i>C.rubra</i> ssp. <i>rubra</i> | 9  | 36a7   | 40.347 | -121.688 | $2x_{(fc)}$ | 1.492 (3) |
| <i>C.rubra</i> ssp. <i>rubra</i> | 45 | h50p11 | 38.79  | -120.185 | $2x_{(fc)}$ | 1.382 (1) |
| <i>C.rubra</i> ssp. <i>rubra</i> | 53 | lsk4   | 41.282 | -122.328 | $2x_{(fc)}$ | 1.327 (1) |
| <i>C.rubra</i> ssp. <i>rubra</i> | 53 | mEEK8  | 39.036 | -120.124 | $2x_{(fc)}$ | 1.504 (3) |
| <i>C.rubra</i> ssp. <i>rubra</i> | 55 | mp3    | 34.794 | -119.041 | $2x_{(fc)}$ | 1.423 (1) |
| <i>C.rubra</i> ssp. <i>rubra</i> | 76 | wash-1 | 38.875 | -120.019 | $2x_{(fc)}$ | 1.472 (2) |
| <i>C.rubra</i> ssp. <i>rubra</i> | 76 | wash-2 | 38.887 | -120.031 | $2x_{(fc)}$ | 1.434 (1) |

---
